# Supplementary material for: Grafted Sertoli Cells Exert Immunomodulatory Non-Immunosuppressive Effects in Preclinical Models of Infection and Cancer
Source: MDPI journal article supplement (doi:10.3390/cells13060544), 2024-03-19
Supplement: s1 [file s1]

## SUPPLEMENTARY MATERIAL

**Table S1.** Primers used in real-time PCR analyses.

| Gene          | Forward primer 5'-3'           | Reverse primer 5'-3'          |
|---------------|--------------------------------|-------------------------------|
| <i>Actb</i>   | ATTACTGCTCTGGCTCCTA            | ATCTGCTGGAAGGTGGAC            |
| <i>Ccr2</i>   | AGAGAGCTGCAGCAAAAGG            | GGAAAGAGGCAGTTGCAAAG          |
| <i>Cxcl1</i>  | CCGCTCGCTTCTCTGTGC             | CTCTGGATGTTCTTGAGGTGAATC      |
| <i>Cyp1a1</i> | ACAGTGATTGGCAGAGATCG           | GAAGGGGACGAAGGATGAAT          |
| <i>Cyp1b1</i> | TTCTCCAGCTTTTTCCTGT            | TAATGAAGCCGTCCTTGTC           |
| <i>Gapdh</i>  | GCCTTCCGTGTTCTACCC             | CAGTGGGCCCTCAGATGC            |
| <i>Ido1</i>   | CCCACACTGAGCACGGACGG           | GCCCTTGTCGCAGTCCCCAC          |
| <i>Il1b</i>   | TGA CGG ACC CCA AAA GAT GAA GG | CCA CGG GAA AGA CAC AGG TAG C |
| <i>Il1ra</i>  | TTGTGCCAAGTCTGGAGATG           | CAGCTGACTCAAAGCTGGTG          |
| <i>Il6</i>    | CCGGAGAGGAGACTTCACAG           | TCCACGATTTCAGAGAAC            |
| <i>Il10</i>   | GAGAAGCATGGCCCAGAAATCAAG       | ATCACTCTTCACCTGCTCCACTGC      |
| <i>Il17a</i>  | GACTACCTCAACCGTCCAC            | CCTCCGATTGACACAGC             |
| <i>Il22</i>   | CTGCCTGCTTCTCATTGCCCTGTG       | GATGTACGGCTGCTGGAAGTTGG       |
| <i>Mmp2</i>   | AACGGTCGGAATACAGCAG            | ATGGGTGGATCTTCATGGGG          |
| <i>Mmp9</i>   | TAGCACAACAGCTGACTACG           | ATCCTGGTCATAGTTGGCTG          |
| <i>S100a8</i> | TCGTGACAATGCCGTCTGAACTG        | TGCTACTCCTTGTGGCTGTCTTTG      |
| <i>S100a9</i> | CGCAGCATAACCACCATCATC          | GCCATCAGCATCATACACTCC         |
| <i>Snai1</i>  | CTTGTGTCTGCACGACCTGT           | CATCCGAGTGGGTTTGGAGG          |
| <i>Twist1</i> | CTGCCCTCGGACAAGCTGAG           | CTAGTGGGACGCGGACATGG          |
| <i>Vegfa</i>  | TATTCAGCGGACTCACCAGC           | AACCAACCTCCTCAAACCGT          |
| <i>Vegfb</i>  | TGACGATGGCCTGGAATGTG           | GAGGATCCTGGGGCTGTCT           |
| <i>Vegfc</i>  | GCTGATGTCTGTCTGTACCC           | AGAAGGTGTTGTGGCTGCT           |
| <i>Vegfr2</i> | TCCACATGGGCGAATCACTC           | GCAATTCTGTCACCCAGGGA          |
| <i>Zeb1</i>   | GGAGAGGTGACTGGTTGTGG           | GCCACATCAGCAATAGCAGC          |

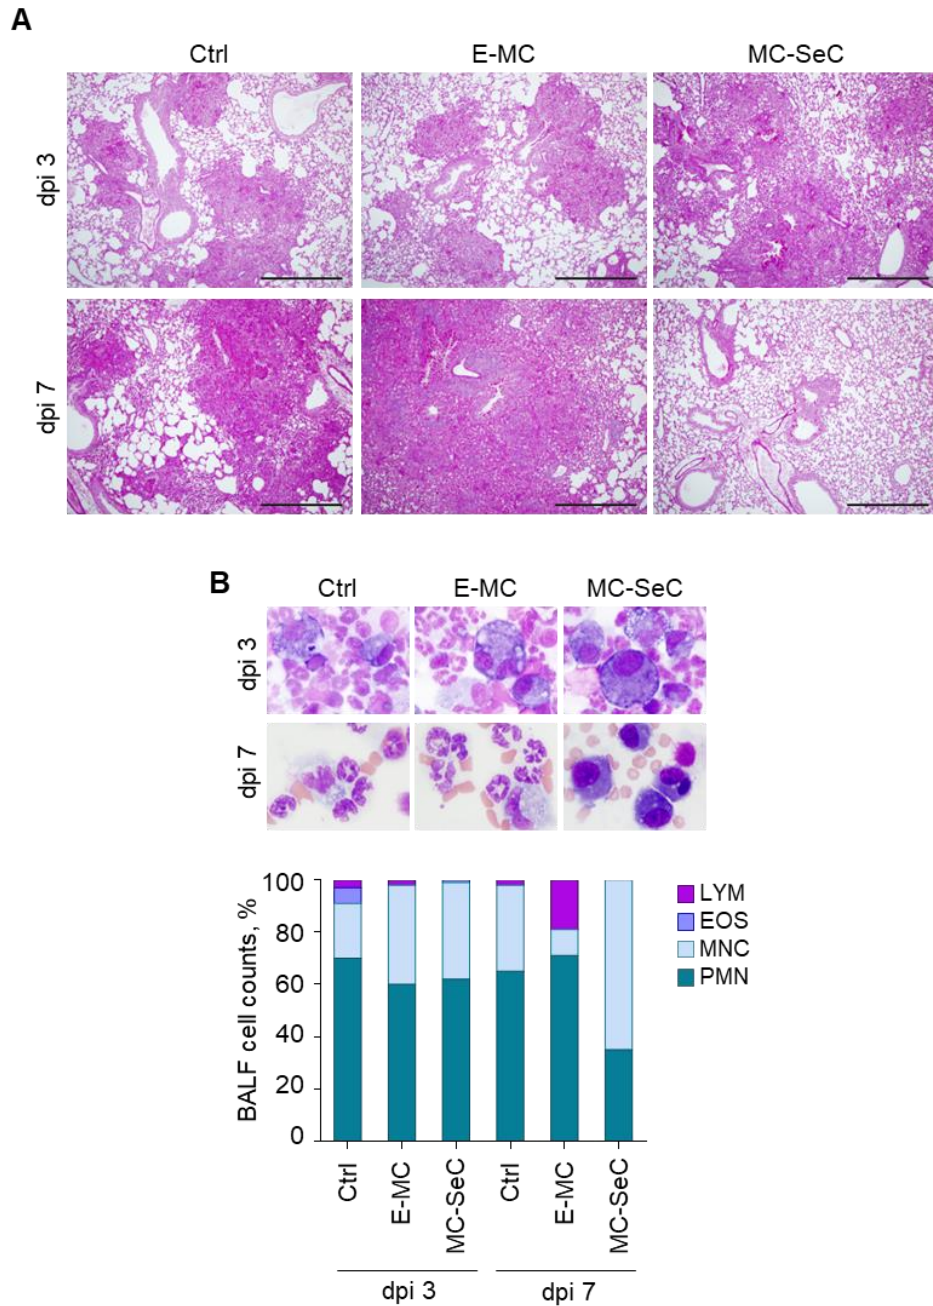

**Figure S1. Grafted SeC protect from *A. fumigatus* intratracheal infection. (A,B)** Control mice (Ctrl) and mice injected i.p. with MC-SeC ( $1.0 \times 10^6$  SeC/g body weight) or equivalent amount of E-MC were infected intratracheally with *A. fumigatus* conidia. Periodic acid-Schiff staining of lungs (A), and BALF morphometry analysis (B) were performed at 3 and 7 days post-infection (dpi). Reported are BALF differential cell counts. Scale bars (A), 1 mm; original magnification (B), 100X.

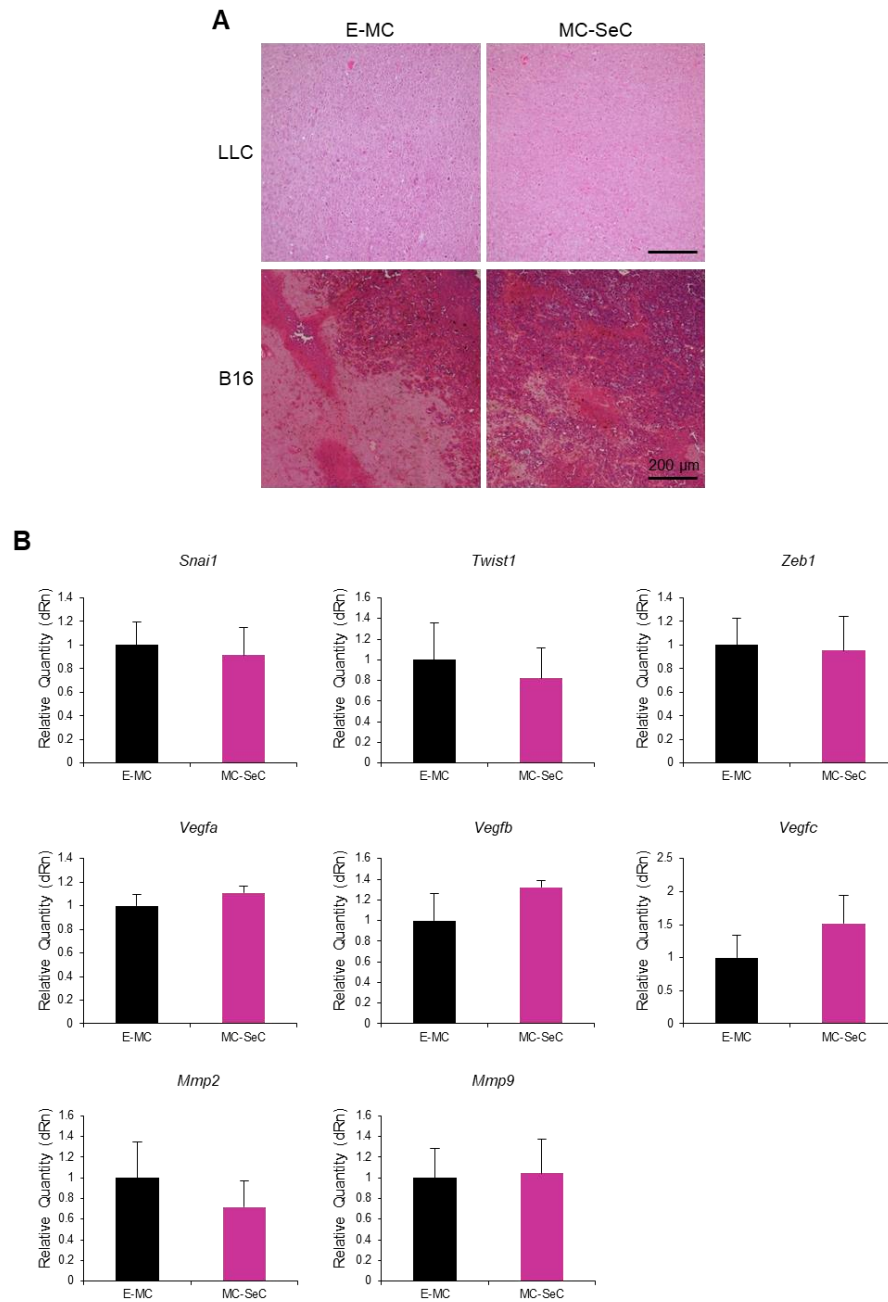

**Figure S2. Grafted SeC do not affect primary tumor histology. (A)** Primary LLC and B16 tumor masses developed in mice injected i.p. with MC-SeC ( $1.0 \times 10^6$  SeC/g body weight) or equivalent amount of E-MC were histologically evaluated after hematoxylin-eosin staining. Shown are representative images. Scale bars, 200  $\mu$ m. **(B)** LLC tumor masses were evaluated for the expression of epithelial-mesenchymal transition markers (*Snai1*, *Twist1*, and *Zeb1*), matrix metalloproteases (*Mmp2* and *Mmp9*), and angiogenesis markers (*Vegfa*, *Vegfb*, and *Vegfc*) by real-time PCR.
